## UBLED AF study for safety and efficacy between uninterrupted edoxaban, warfarin and rivaroxaban for AF/Fl ablation patients

Kumar N.; Elbanhawy N.; Chalil S.; Abozguia K.

Blackpool Teaching Hospitals NHS Trust, Blackpool, United Kingdom of Great Britain & Northern Ireland

**Funding Acknowledgements:** Type of funding sources: None.

**Introduction:** Catheter ablation in patients with atrial fibrillation (AF)/atrial flutter carries a risk of thromboembolism and major bleeding. Oral anticoagulation is advised for prevention of thromboembolic complications.

### Purpose

In light of recent prospective trial data on the safety and efficacy of uninterrupted edoxaban in patients undergoing AF/flutter ablation, real-world data was aimed to be compared.

**Methods:** A total of 228 patients who underwent AF/atrial flutter ablation over 14 months at our centre were retrospectively analyzed. All patients received uninterrupted oral anticoagulation for at least 4 weeks prior to ablation and 3 months post-ablation. Both bleeding and thromboembolic events were assessed at 24 hours comparing patients on warfarin, rivaroxaban and edoxaban.

**Results:** Mean age of patients were 68.5  $\pm$  8 years in the warfarin group (N = 86), 63.4  $\pm$  10.6 years; in the edoxaban group (N = 63) and 62.3  $\pm$  11.6 years in the rivaroxaban group (N = 79). CHADSVASc scores were 2.43  $\pm$  1.34, 1.68  $\pm$  1.34 and 1.64  $\pm$  1.38 respectively. The mean left atrial sizes were 42.7  $\pm$  6.8 mm, 42.0  $\pm$  6 mm and 41.1  $\pm$  6.5 mm respectively. The study endpoint was death, acute thromboembolism or major bleeding. There was 1 pericardial effusion (1.2%) in the warfarin group, 1 pericardial effusion and 1 transient ischaemic attack (2.5%) in the rivaroxaban group and 1 pericardial effusion needing drainage (1.6%) in the edoxaban group. There were no significant differences in the study endpoints between groups.

**Conclusion:** This real-world study demonstrated no significant difference in safety and efficacy between uninterrupted edoxaban, warfarin and rivaroxaban in patients undergoing AF/flutter ablation.
